# Supplementary material for: Regulation of microcrystalline and pore structures in pitch-based hard carbon via liquid-phase crosslinking-assisted grain boundary etching to enhance sodium storage performance
Source: Royal Society of Chemistry journal article supplement (doi:10.1039/d4ta08528k), 2025-01-01
Supplement: d4ta08528k1.pdf [file d4ta08528k1.pdf]

## Supporting information

### R Regulation of Microcrystalline and Pore Structures in Pitch-Based Hard Carbon via Liquid-Phase Crosslinking-Assisted Grain Boundary Etching to Enhance Sodium Storage Performance

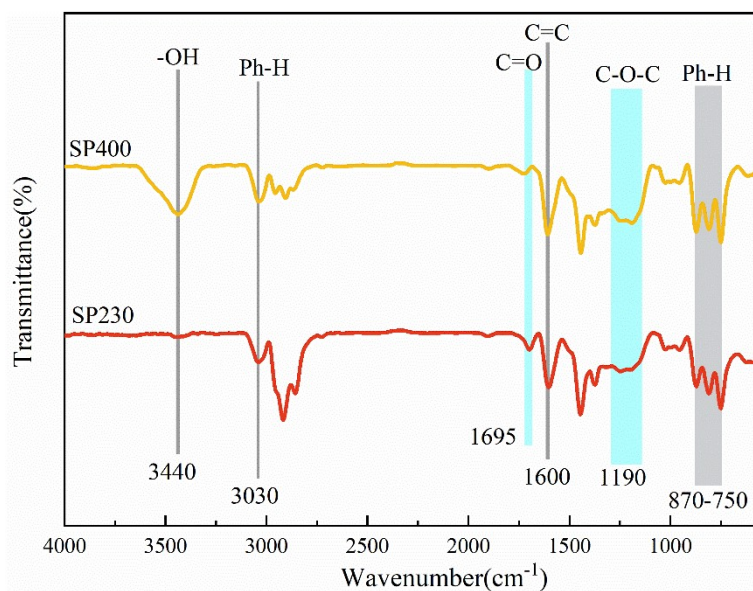

Figure S1. FTIR spectra of SP230 and SP400.

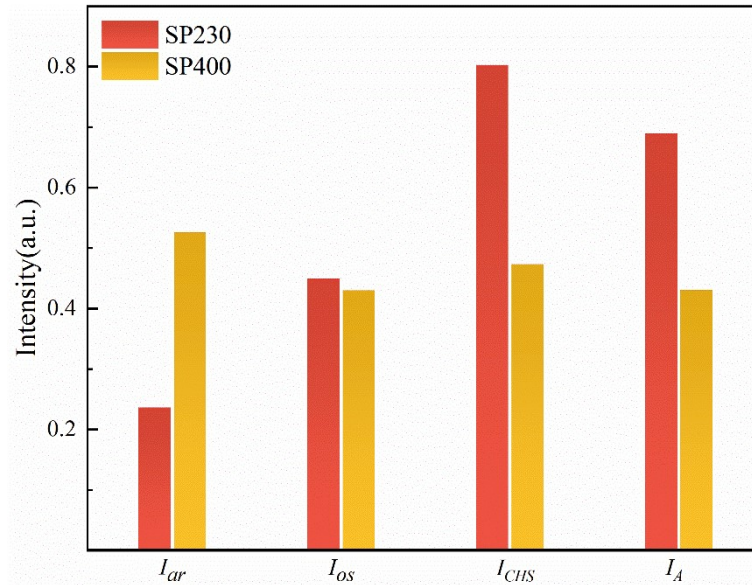

Figure S2. FTIR structural indices of SP230 and SP400.

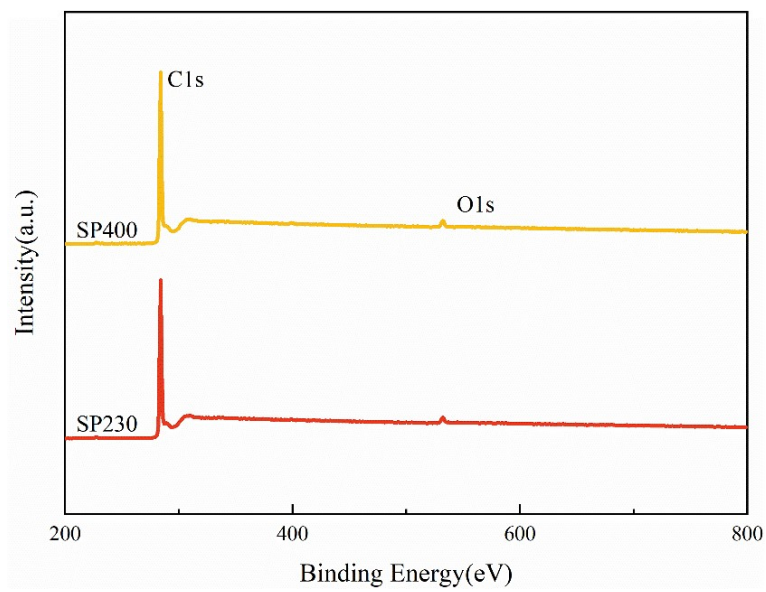

Figure S3 XPS spectra of SP230 and SP400.

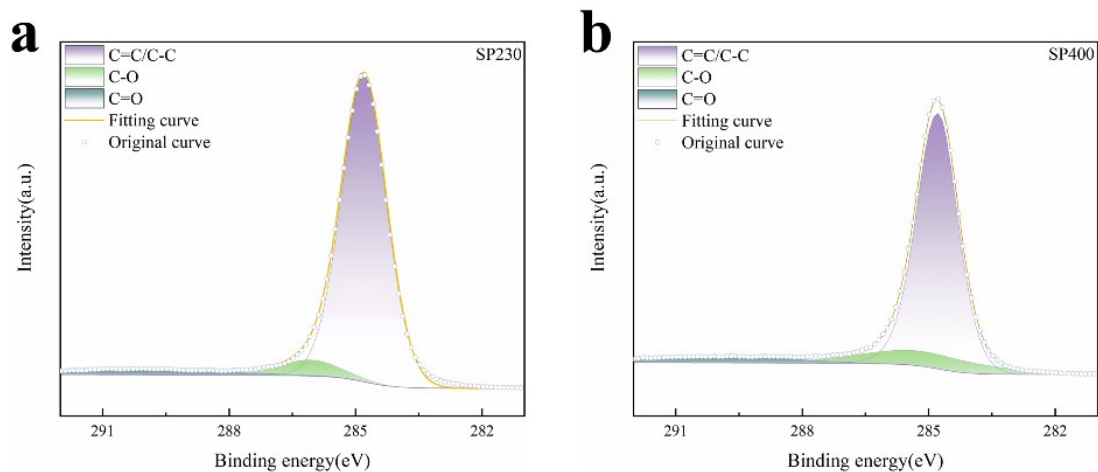

Figure S4. C1s XPS spectra of SP230 and SP400.

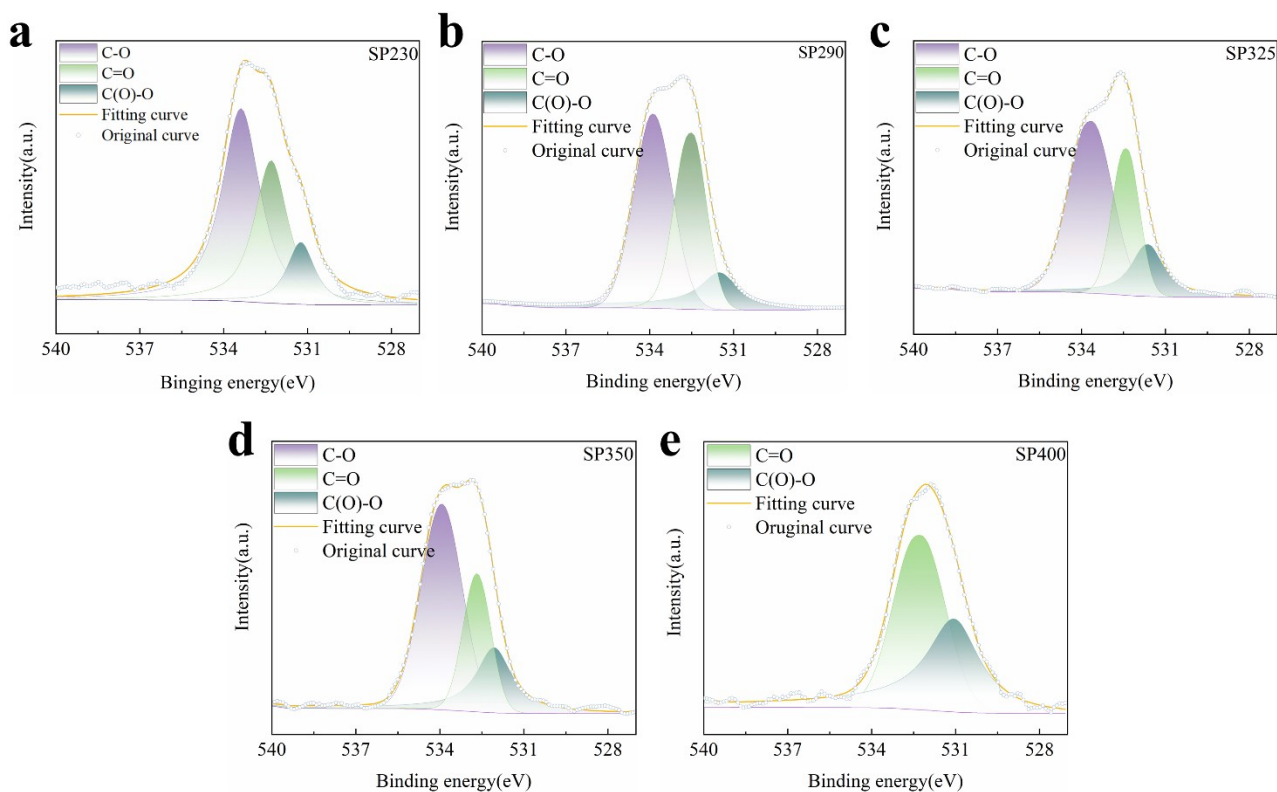

Figure S5. O1s XPS spectra of SP230 SP290, SP325, SP350 and SP400.

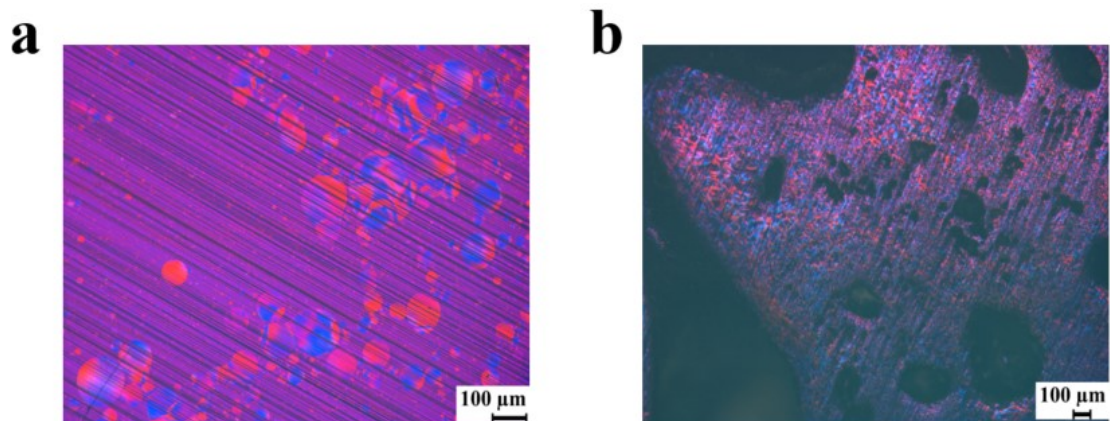

Figure S6. The optical microscopic images of HO and SP325 carbonization for 1 h.

Figure S6.

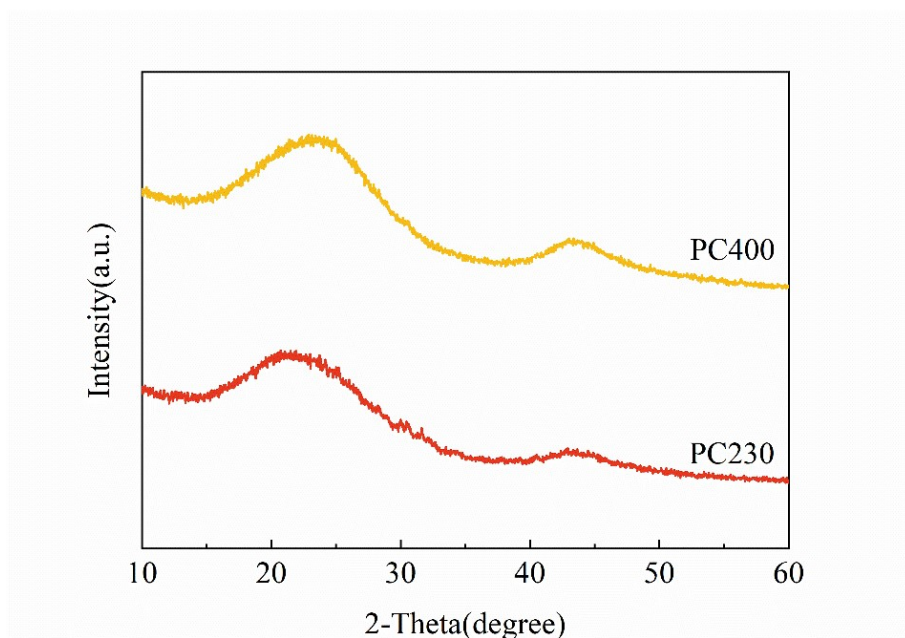

Figure S7. XRD spectra of PC230 and PC400.

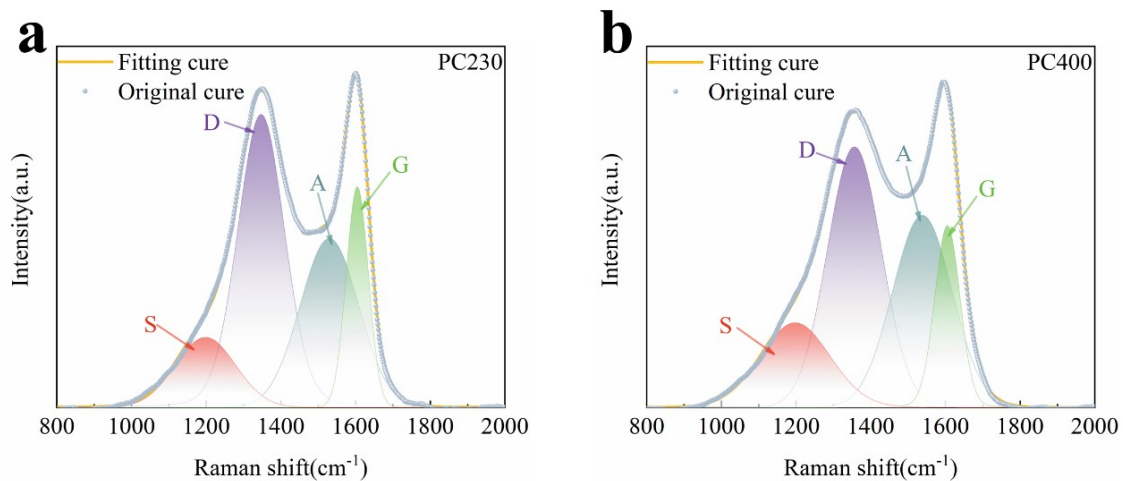

Figure S8. Raman spectra and fitted curves of PC230 and PC400.

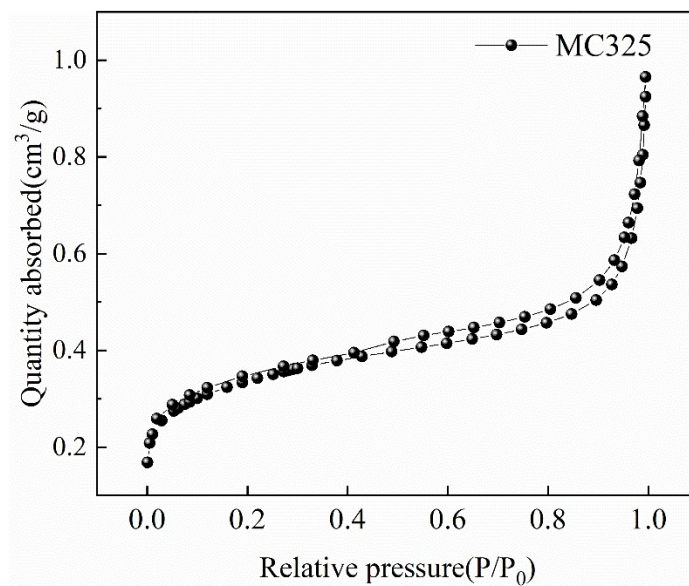

Figure S9. The  $\text{N}_2$  adsorption-desorption isotherms of MC325

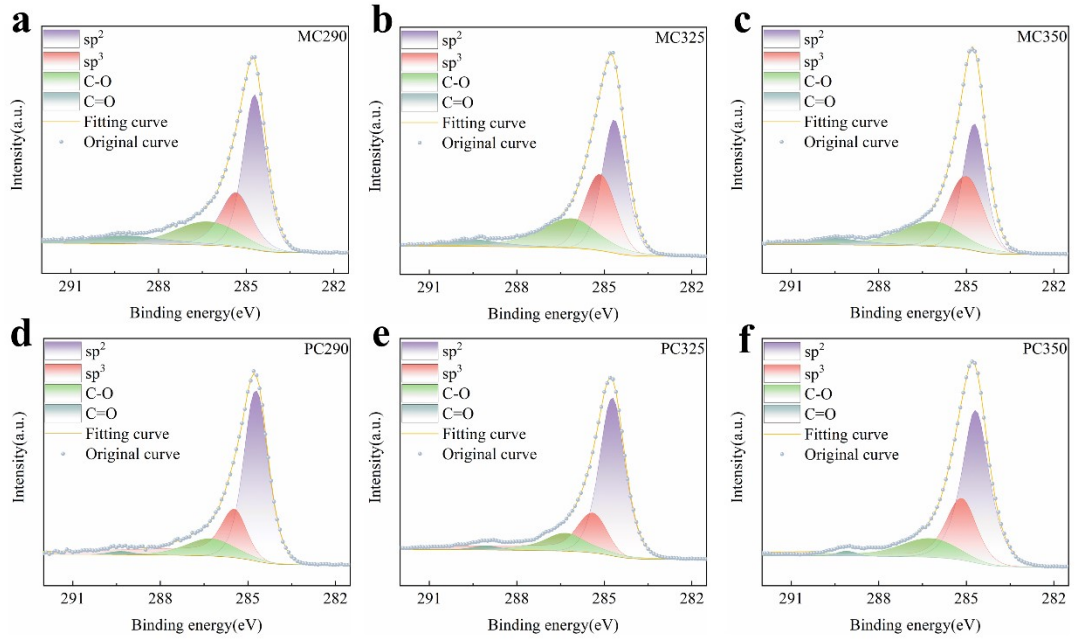

Figure S10. (a-c) C1s XPS spectra of MC290, MC325 and MC350. (d-f) C1s XPS spectra of PC290, PC325 and PC350.

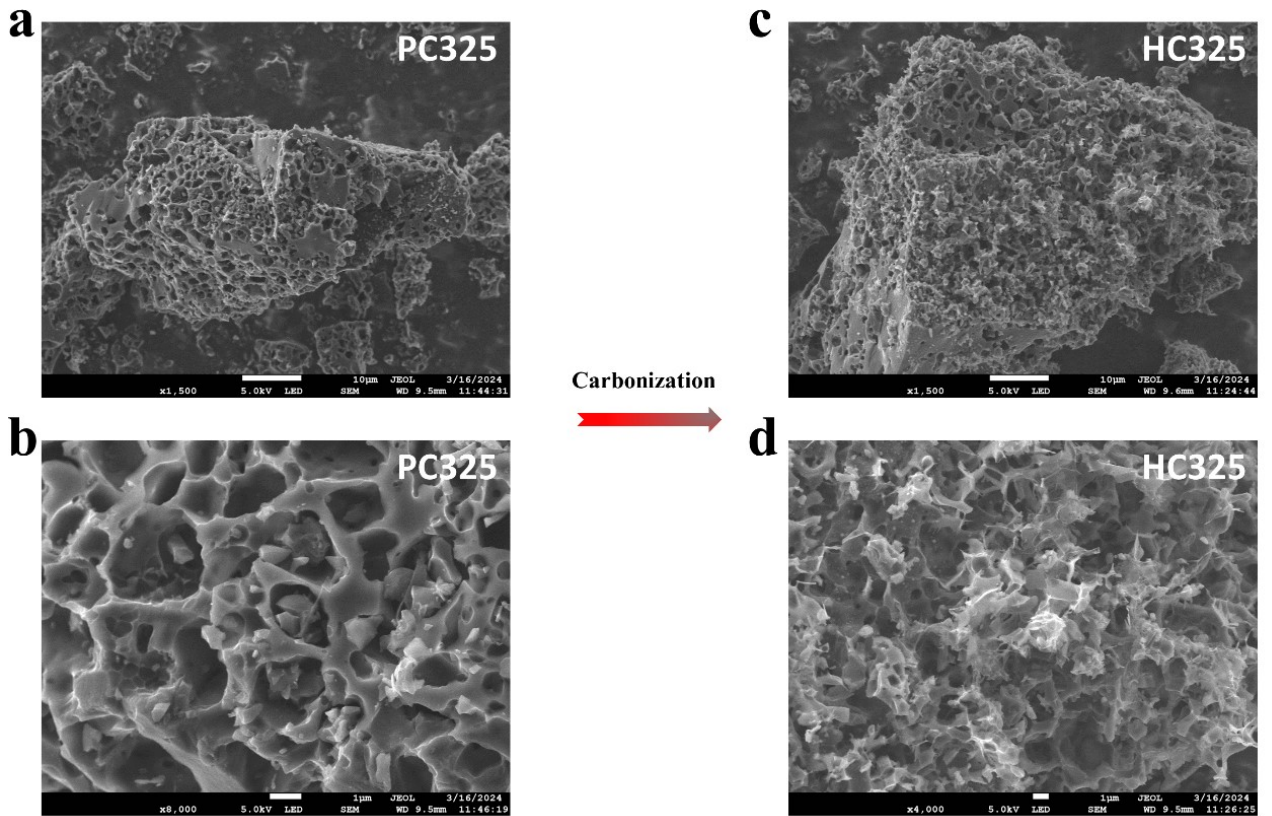

Figure S11. SEM images of PC325 and HC325.

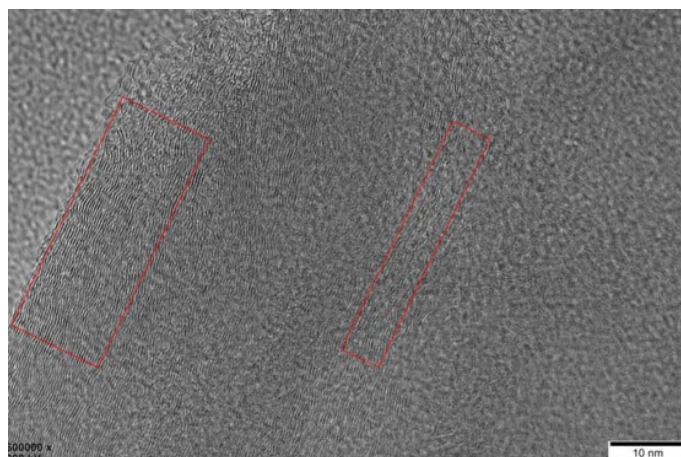

Figure S12. HRTEM images of CMC325

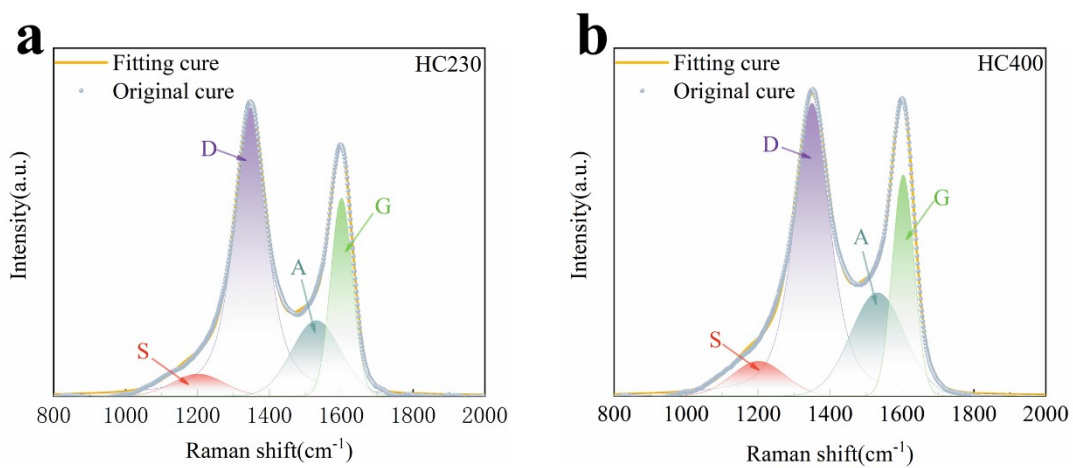

Figure S13. Raman spectra and fitted curves of HC230 and HC400.

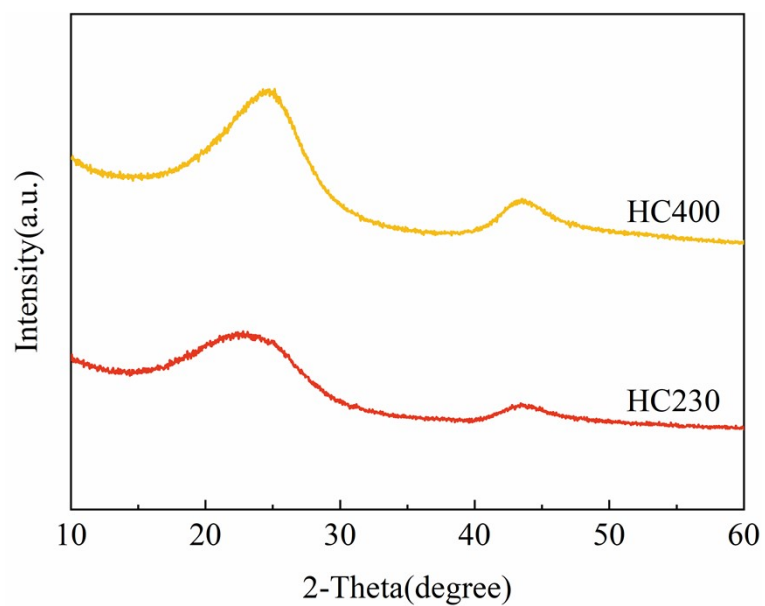

Figure S14. XRD spectra of HC230 and HC400.

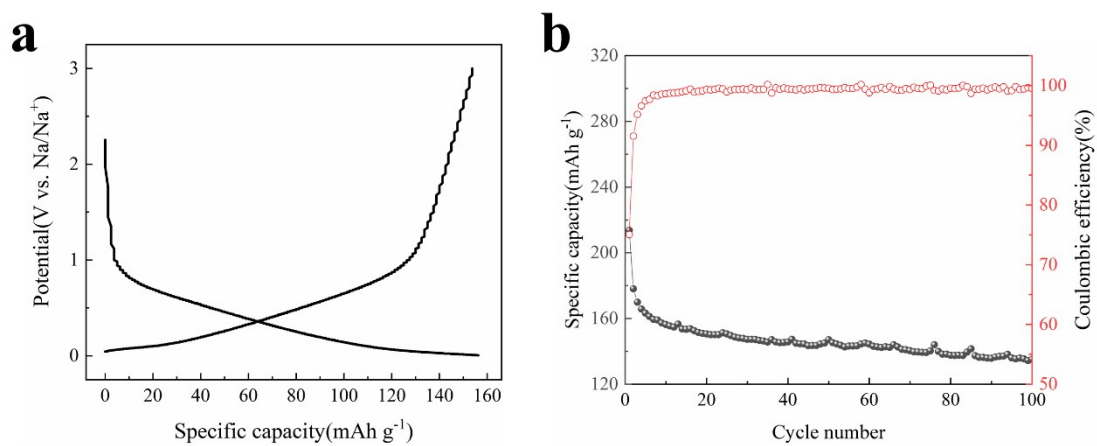

Figure S15. Electrochemical properties of CMC325. (a) GCD curves at  $100 \text{ mA g}^{-1}$ .

(b) Cycling performance of CMC325.



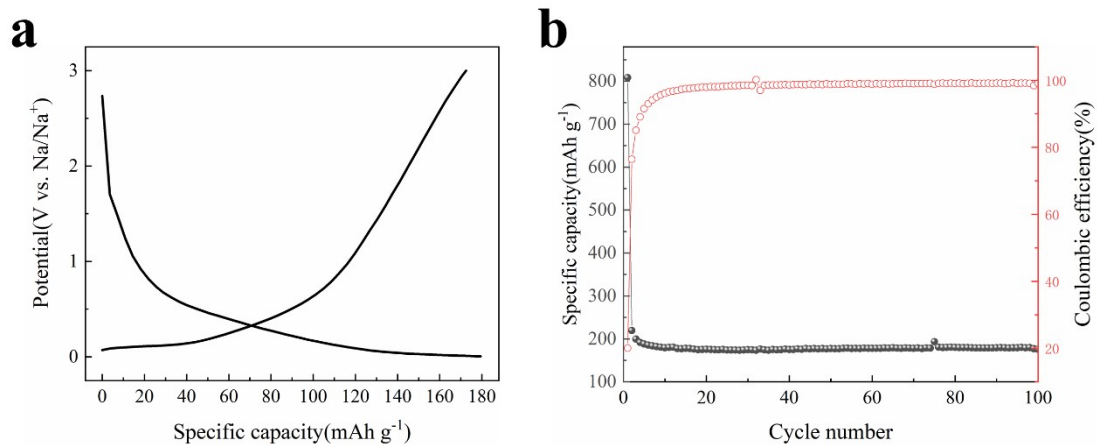

Figure S16. Electrochemical properties of CPNC. (a) GCD curves at  $100 \text{ mA g}^{-1}$ . (b) Cycling performance of CPNC.

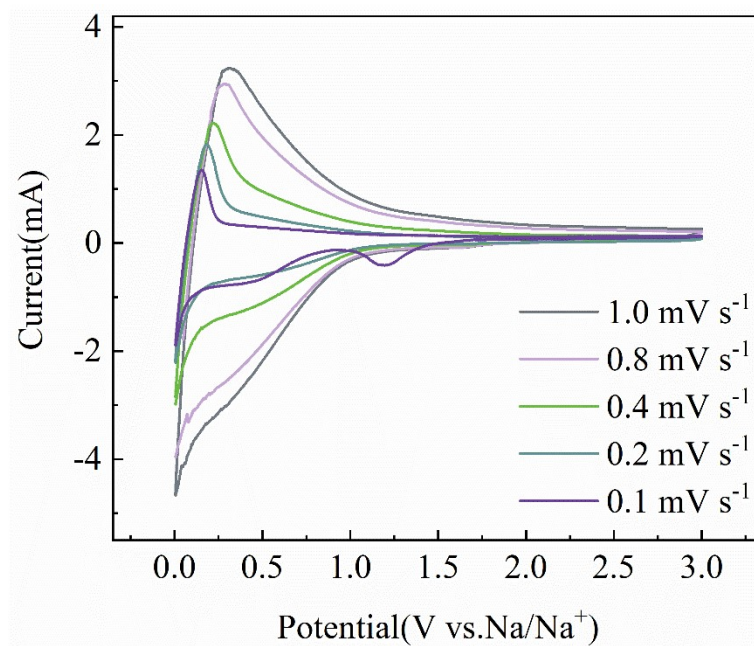

Figure S17. CV curve at different scan rates of HC325.

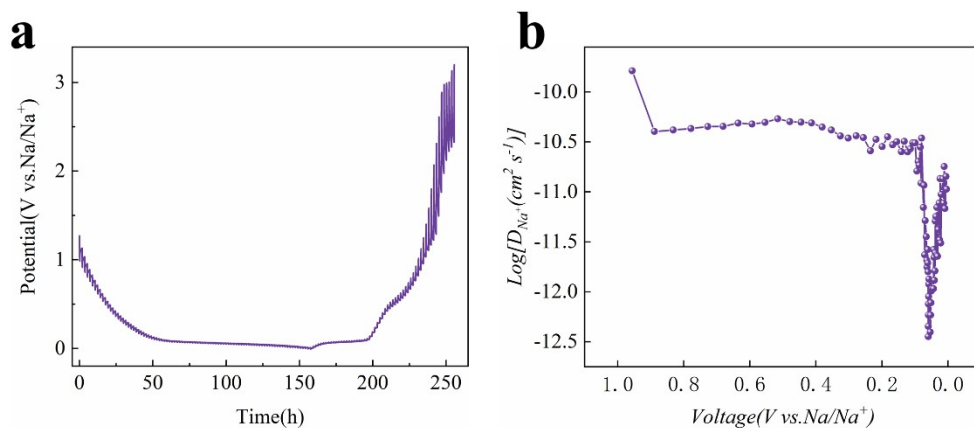

Figure S18. GITT curves of HC325.

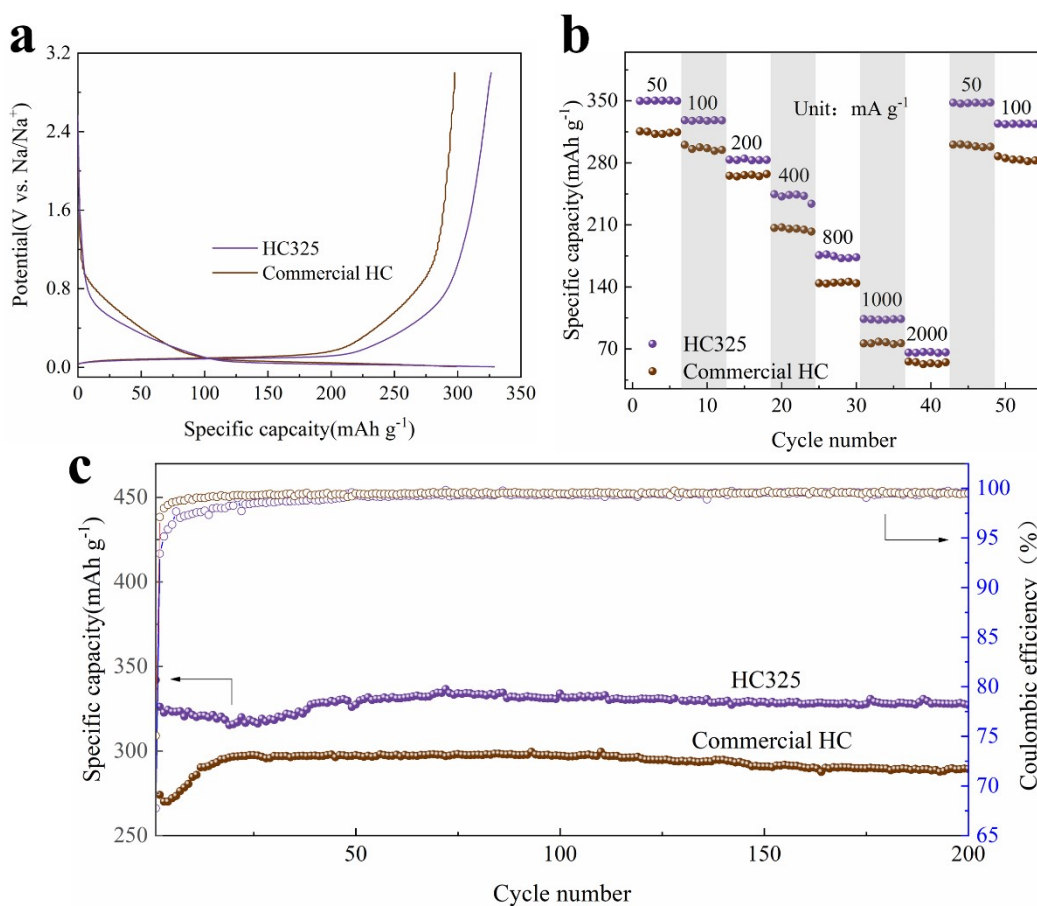

Figure S19. Electrochemical properties of Hard carbon. (a) GCD curves at 100 mA g<sup>-1</sup>. (b) Rate performance of HC325 and Commercial HC. (c) Cycling performance of HC325 and Commercial HC.

Table S1. Basic properties of HO.

| Basic properties                    | HO    |
|-------------------------------------|-------|
| Density (20°C)/(g/cm <sup>3</sup> ) | 1.18  |
| <i>C</i> /wt%                       | 90.11 |
| <i>H</i> /wt%                       | 9.14  |
| Elemental composition               |       |
| <i>S</i> /wt%                       | 0.58  |
| <i>N</i> /wt%                       | 0.17  |
| <i>O</i> /wt%                       | 0     |
| <i>C/H</i>                          | 0.97  |
| Saturates /wt%                      | 13.77 |
| SARA Four components                |       |
| Aromatics /wt%                      | 73.78 |
| Resins /wt%                         | 11.25 |
| Asphaltenes /wt%                    | 1.21  |

Table S2. Elemental analysis of cross-linked pitch.

| Sample | <i>C</i> /wt% | <i>H</i> /wt% | <i>S</i> /wt% | <i>N</i> /wt% | <i>O</i> /wt% |
|--------|---------------|---------------|---------------|---------------|---------------|
| SP230  | 89.21         | 8.01          | 0.64          | 0.11          | 2.03          |
| SP290  | 87.89         | 7.32          | 0.66          | 0.09          | 4.04          |
| SP325  | 87.52         | 6.64          | 0.54          | 0.09          | 5.21          |
| SP350  | 86.96         | 6.39          | 0.51          | 0.08          | 6.06          |
| SP400  | 91.22         | 6.02          | 0.49          | 0.09          | 2.18          |

Table S3. FTIR structural indices of cross-linked pitch

| Sample | $I_{ar}$ | $I_{os}$ | $I_{CH}$ | $I_A$  |
|--------|----------|----------|----------|--------|
| HO     | 0.1681   | 0.4491   | 0.8319   | 0.7802 |
| SP230  | 0.2368   | 0.4495   | 0.8032   | 0.6897 |
| SP290  | 0.2545   | 0.4425   | 0.7955   | 0.7221 |
| SP325  | 0.2833   | 0.4403   | 0.7167   | 0.6591 |
| SP350  | 0.3433   | 0.4393   | 0.6567   | 0.6209 |
| SP400  | 0.5265   | 0.4305   | 0.4735   | 0.4313 |

$I_{ar}$ : the fraction of aromatic carbon without alkyl substituents, indicating the degree of condensation of sample, defined by the formula:  $I_{ar} = Abs_{3050} / (Abs_{3050} + Abs_{2920})$ .

$I_{os}$ : the fraction of aromatic rings with ortho-substituents (i.e. four neighboring hydrogen atoms) compared to all aromatic rings with at least one hydrogen atom, which responds to the relative size and degree of condensation of aromatic molecules, defined by the formula:  $I_{os} = Abs_{750} / (Abs_{750} + Abs_{814} + Abs_{840} + Abs_{880})$ .

$I_{CH}$ : fraction of aromatic carbons that are substituted by alkyl side chains or methylene groups, indicating the number of alkyl side chains, defined by the formula:  $I_{CH} = Abs_{2920} / (Abs_{3050} + Abs_{2920})$

$I_A$ : the fraction of alkyl groups that are linked to non-aromatic carbon atoms (instead of aromatic carbon atoms) and it can reflect the length of the alkyl side chain, which is defined by the formula:  $I_A = Abs_{2960} / (Abs_{3050} + Abs_{2960})$ .

Table S4. XPS compositional analysis, fitted parameters of the C 1s, and O 1s spectra of cross-linked pitch.

| Binding Energy (eV) | C1s              |              |              | O1s             |              |              |
|---------------------|------------------|--------------|--------------|-----------------|--------------|--------------|
|                     | 284.8<br>C-C/C=C | 286.3<br>C-O | 289.4<br>C=O | 531.8<br>C(O)-O | 532.6<br>C=O | 533.8<br>C-O |
| SP230               | 87.61            | 6.04         | 6.46         |                 |              |              |
| SP290               | 68.85            | 27.23        | 3.92         | 16.97           | 35.77        | 47.26        |
| SP325               | 75.9             | 18.93        | 5.17         | 17.53           | 28.06        | 54.41        |
| SP350               | 78.6             | 15.17        | 6.24         | 21.13           | 24.85        | 54.02        |
| SP400               | 74.21            | 18.35        | 7.43         | 33.58           | 59.41        | 7.01         |

Table S5. Structure parameters of PC

| Sample | $L_C$<br>/ nm | $d_{002}$<br>/ nm | $N$   | $L_a$<br>/ nm | $I_D/I_G$ | $I_A/I_G$ | $L_a$ (Raman)<br>/ nm | $S_{BET}(N_2)$<br>/ m <sup>2</sup> /g | $V_{total}$<br>/ cm <sup>3</sup> /g |
|--------|---------------|-------------------|-------|---------------|-----------|-----------|-----------------------|---------------------------------------|-------------------------------------|
| PC230  | 1.458         | 0.413             | 4.528 | 6.06          | 2.93      | 2.02      | 6.55                  | 518.57                                | 0.221                               |
| PC290  | 1.270         | 0.415             | 4.056 | 5.28          | 3.14      | 2.27      | 6.12                  | 534.82                                | 0.220                               |
| PC325  | 0.948         | 0.417             | 3.272 | 5.01          | 3.28      | 2.31      | 5.86                  | 739.07                                | 0.299                               |
| PC350  | 0.930         | 0.418             | 3.222 | 4.78          | 3.39      | 2.23      | 5.68                  | 554.33                                | 0.230                               |
| PC400  | 0.926         | 0.391             | 3.368 | 5.17          | 2.96      | 1.06      | 6.49                  | 528.44                                | 0.223                               |
| MC325  | 1.536         | 0.358             | 5.291 | 5.81          | 2.22      | 1.88      | 8.66                  | 9.787                                 | 0.006                               |

Table S6. Structure parameters of HC

| Sample | $L_C$<br>/ nm | $d_{002}$<br>/ nm | $N$   | $L_a$<br>/ nm | $I_D/I_G$ | $I_A/I_G$ | $L_a$ (Raman)<br>/ nm |
|--------|---------------|-------------------|-------|---------------|-----------|-----------|-----------------------|
| HC230  | 1.329         | 0.379             | 4.451 | 7.12          | 2.38      | 0.72      | 8.07                  |
| HC290  | 1.205         | 0.381             | 4.162 | 5.37          | 2.52      | 0.81      | 7.63                  |
| HC325  | 1.094         | 0.380             | 3.879 | 5.12          | 2.59      | 0.98      | 7.42                  |
| HC350  | 1.089         | 0.380             | 3.866 | 4.87          | 2.69      | 1.12      | 7.14                  |
| HC400  | 1.388         | 0.361             | 4.854 | 5.83          | 2.48      | 1.15      | 7.73                  |

Table S7. Specific surface area and pore volume of HC.

| Sample | $S_{BET}(N_2)$<br>/ m <sup>2</sup> g <sup>-1</sup> | $V_{total}$<br>/ cm <sup>3</sup> g <sup>-1</sup> | $S_{SAXS}$<br>/ m <sup>2</sup> g <sup>-1</sup> | True density | $V_{Closed}$ |
|--------|----------------------------------------------------|--------------------------------------------------|------------------------------------------------|--------------|--------------|
| HC230  | 12.47                                              | 0.014                                            | -                                              | 1.8472       | 0.0989       |
| HC290  | 42.23                                              | 0.030                                            | 691.9                                          | 1.5948       | 0.1846       |
| HC325  | 71.84                                              | 0.042                                            | 783.6                                          | 1.5372       | 0.2081       |
| HC350  | 122.28                                             | 0.059                                            | 640.5                                          | 1.6473       | 0.1646       |
| HC400  | 5.79                                               | 0.008                                            | -                                              | 2.0131       | 0.0543       |

Table S8. Structure parameters of carbon materials.

| Sample | $L_C$<br>/ nm | $d_{002}$<br>/ nm | $N$ | $L_a$<br>/ nm | $I_D/I_G$ | $I_A/I_G$ | $L_a$ (Raman)<br>/ nm |
|--------|---------------|-------------------|-----|---------------|-----------|-----------|-----------------------|
|--------|---------------|-------------------|-----|---------------|-----------|-----------|-----------------------|

|        |       |       |        |       |      |      |       |
|--------|-------|-------|--------|-------|------|------|-------|
| NC     | 1.657 | 0.349 | 5.748  | 7.28  | 1.77 | 1.26 | 10.87 |
| PNC    | 1.416 | 0.358 | 4.955  | 5.76  | 2.17 | 1.60 | 8.85  |
| CNC    | 3.651 | 0.345 | 11.531 | 23.53 | 1.07 | 0.67 | 17.97 |
| MC290  | 1.541 | 0.355 | 5.341  | 6.06  | 2.05 | 1.75 | 9.34  |
| MC325  | 1.536 | 0.358 | 5.291  | 5.81  | 2.22 | 1.88 | 8.66  |
| MC350  | 1.392 | 0.362 | 4.845  | 4.58  | 2.35 | 1.95 | 8.18  |
| CMC325 | 3.092 | 0.347 | 9.911  | 17.64 | 1.24 | 1.01 | 15.53 |

Table S9. XPS compositional analysis, fitted parameters of the C1s spectra of Carbon materials.

| Binding Energy (eV) | <i>C1s</i>                 |                            |            |            |
|---------------------|----------------------------|----------------------------|------------|------------|
|                     | <i>C=C(sp<sup>2</sup>)</i> | <i>C-C(sp<sup>3</sup>)</i> | <i>C-O</i> | <i>C=O</i> |
| MC290               | 47.02                      | 23.89                      | 19.74      | 9.35       |
| MC325               | 41.72                      | 29.76                      | 23.01      | 5.44       |
| MC350               | 38.87                      | 33.28                      | 21.21      | 6.64       |
| PC290               | 57.43                      | 29.93                      | 11.69      | 1.03       |
| PC325               | 58.37                      | 26.94                      | 13.13      | 1.56       |
| PC350               | 46.86                      | 25.66                      | 14.84      | 0.97       |

Table S10. Electrochemical properties of Hard Carbon derived from fossil feedstocks

| Materials | Specific capacity | Plateau capacity | Current density | ICE | Ref. |
|-----------|-------------------|------------------|-----------------|-----|------|
|-----------|-------------------|------------------|-----------------|-----|------|

| <b>Heavy Oil</b> | <b>328 mAh/g</b> | <b>223.2 mAh/g</b> | <b>0.1A/g</b> | <b>67%</b> | <b>This work</b> |
|------------------|------------------|--------------------|---------------|------------|------------------|
| Pitch            | 300.6 mAh/g      | -                  | 0.1C          | 88.6%      | [1]              |
| Pitch and Lignin | 254 mAh/g        | 163.8 mAh/g        | 0.03A/g       | 82%        | [2]              |
| Coal and Pitch   | 312.2 mAh/g      | 185.7 mAh/g        | 0.03A/g       | 85.3%      | [3]              |
| Pitch            | 300.83 mAh/g     | 132.2 mAh/g        | 0.02A/g       | 82.82%     | [4]              |
| Pitch and Resin  | 349.9 mAh/g      | -                  | 0.05A/g       | 60.9%      | [5]              |
| Coal tar pitch   | 276.8 mAh/g      | -                  | 0.25C         | 67.5%      | [6]              |
| Polystyrene      | 279.3 mAh/g      | 136.2 mAh/g        | 0.2C          | 70.2%      | [7]              |
| Coal             | 293 mAh/g        | -                  | 0.03A/g       | 84%        | [8]              |
| Coal             | 303.1 mAh/g      | 163.5 mAh/g        | 0.05A/g       | 64.8%      | [9]              |
| Pitch            | 313.83 mAh/g     | -                  | 0.1C          | 86.14      | [10]             |

[1] X. Lu, L. Zhao, G. Qi, R. Qi, H. Li, J. Huang, Q. Chen, S. Hu, *Adv. Energy. Mater.* 2018, 8, 1800108.

[2] M. Li, S. Hu, H. Li, Q. Chen, J. Huang, *J. Mater. Chem. A*, 2016, 4, 96.

[3] H. Chen , N. Sun , X. Wang , Razium Ali Soomro , B. Xu, *Energy. Storage. Mater.* 2023, 56, 532–541.

[4] R. Xu, L. Yi, X. Song, P. Chen, X. Wei, Y. Su , Q. Dai a, H. Sun , F. Yang, J. Xie, M. Chen, *Carbon.* 2023, 206, 94–104.

[5] P. Yin, F. Zhao, X. Wang, C. Feng, X. Lu, Y. Li, L. Long, J. Wang, Y. Ning, J. Zhang, *Small*, 2022, 18, 2105568.

[6] C. Ji, Y. Zhao, J. Cao, Y. Li, L. Ma, G. Qie, P. Shao *J. Mater. Chem. A*, 2023, 11, 26727–26741.

[7] Q. Qiu, S. Jiang, X. Su, R. Zhang, X. Du, S. Xu, Q. Ye, B. Zhang, H. Ban, F. Xu, Q. Wang, *Carbon Energy*, 2024, e479.

[8] R. Zhou, J. Wang, S. Fan, *Chemical Engineering Journal*, 2024, 490, 151428.

[9] R. Ma, X. Chen, Q. Li, Y. Zhang, F. Chen, Y. Leng, Z. Jia, N. Guo, X. Wang, *Chemical Engineering Journal*, 2024, 493, 152389.

[10] B. Wang, K. Xu, P. Lin, Y. Zhong, L. Wang, F. Yuan, P. Tu, *Adv. Energy Mater.* 2024, 2403084.
